# Supplementary figures and images for: Spatio-Temporal Analysis of Suicide-Related Emergency Calls
Source: MDPI journal article supplement (doi:10.3390/ijerph14070735), 2017-07-06

$\beta_1$

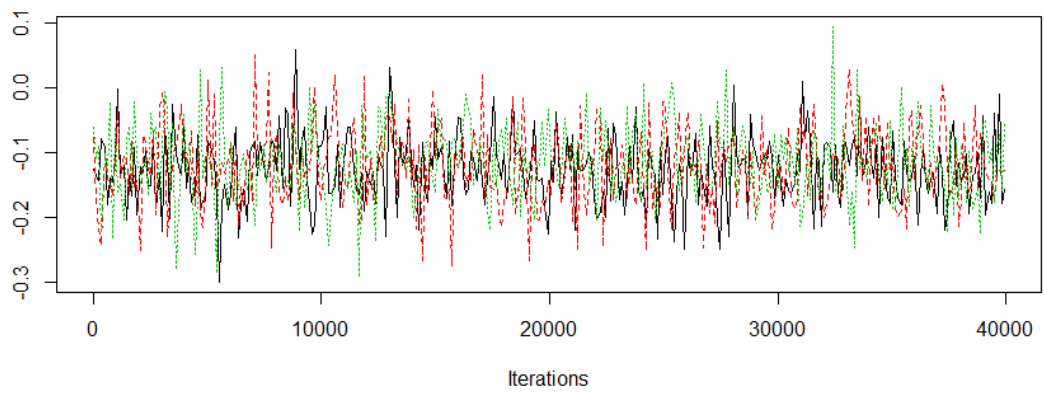

$\beta_2$

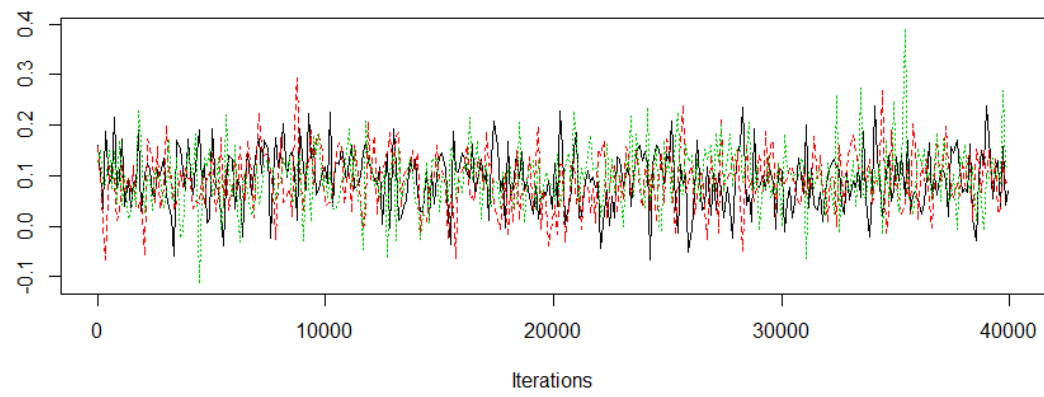

$\beta_3$

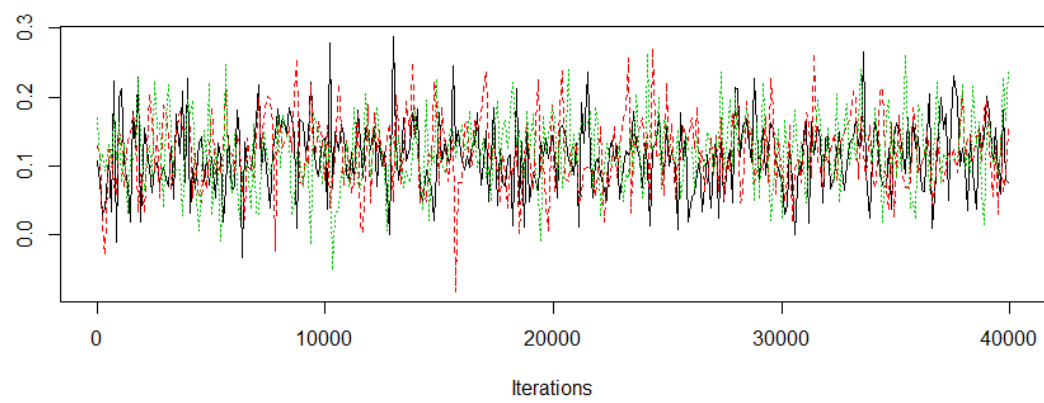

$\sigma_\varphi$

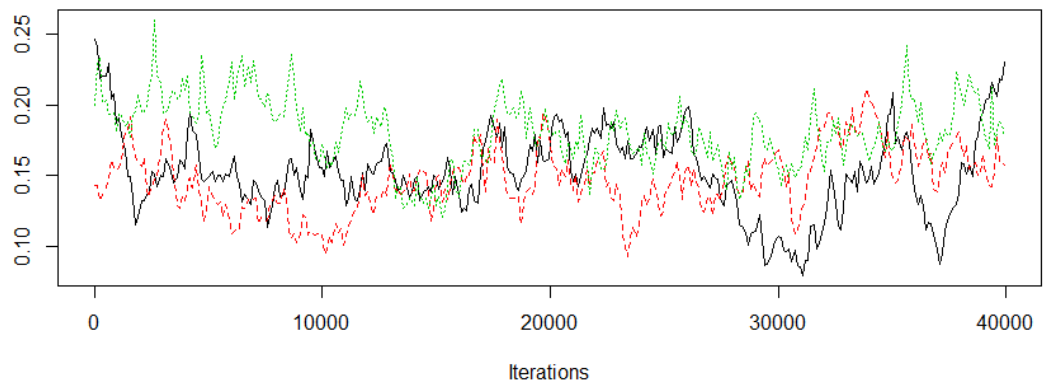

$\sigma_\theta$

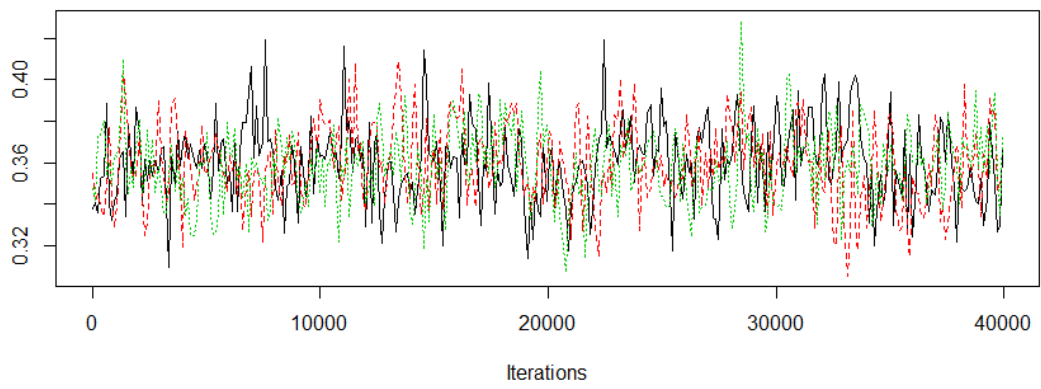

$\sigma_\alpha$

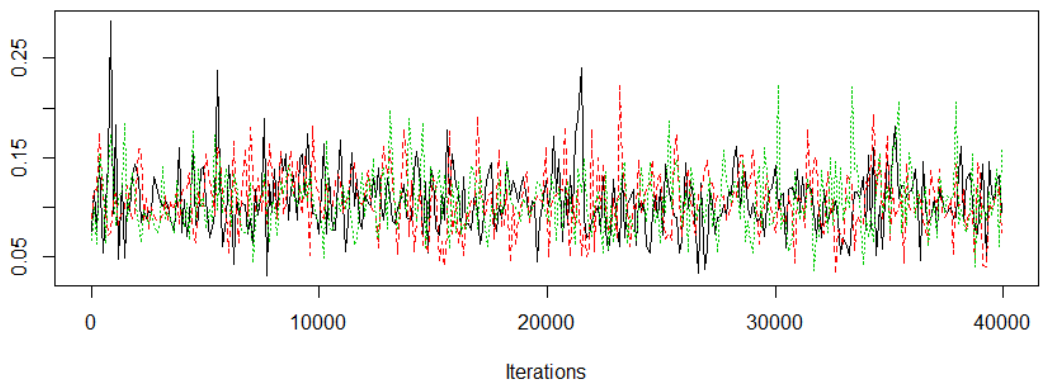

$\rho$

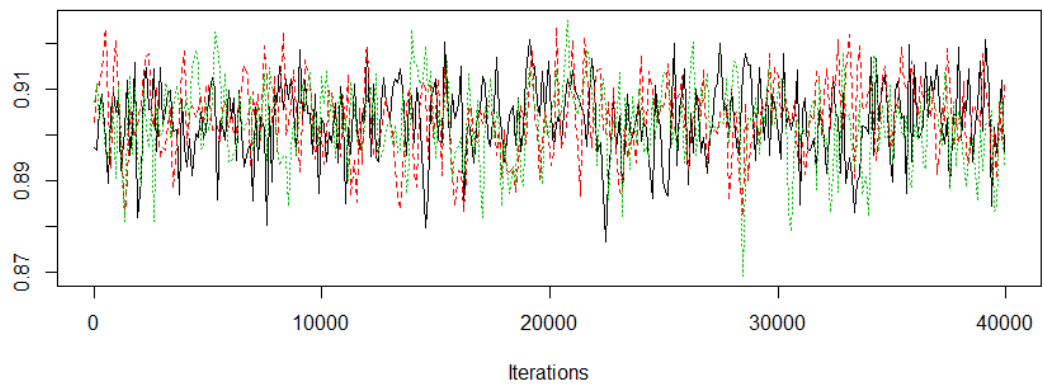

Supplement: s1 [file s1]
